# Supplementary material for: Achiral straight-rod liquid crystals indicating local biaxiality and ferroelectric switching behavior in the smectic A and nematic phases
Source: Royal Society of Chemistry journal article supplement (doi:10.1039/c5tc00389j), 2015-01-01
Supplement: c5tc00389j1.pdf [file c5tc00389j1.pdf]

## Electronic Supplementary Information

### Achiral straight-rod liquid crystals indicating local biaxiality and ferroelectric switching behavior in the smectic A and nematic phases

Keiki Kishikawa\* Takahiro Inoue, Naoshi Hasegawa, Masahiro Takahashi, Michinari Kohri, Tatsuo Taniguchi and Shigeo Kohmoto

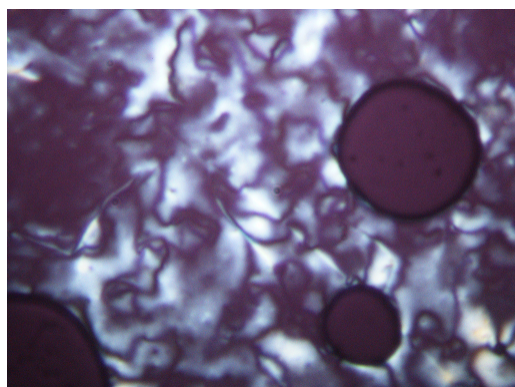

**Fig. S1** The texture of the *N* phase of **1b** under an applied magnetic field (190 °C, the direction of magnetic field (3500 gauss) is perpendicular to the glass surface).

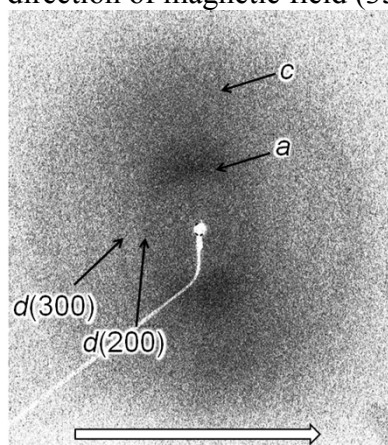

**Fig. S2** 2D-XRD profile of **1b** in the *N* phase (200 °C) under applying a magnetic field (3500 gauss). The interlayer distances ( $d(200)$  and  $d(300)$ ) and the lateral repeat distances ( $a$  and  $c$ ) are indicated with black arrows. The magnetic field was indicated with a large white arrow.

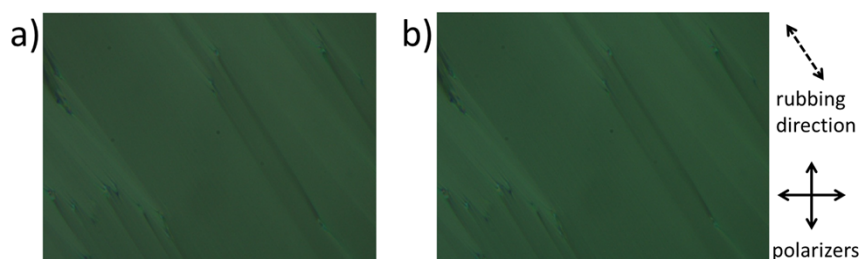

**Fig. S3** Polarized light microphotographs of **1a** in the *SmA* phase (220 °C) at (a) 0 V and (b) +50V, respectively. The sample was sandwiched between two glass plates with ITO-thin layer covered with polyimide (cell gap: 5 $\mu$ m, ITO area: 10 mm x 10 mm). The arrows with broken and solid lines indicate the directions of rubbing and polarizers, respectively.

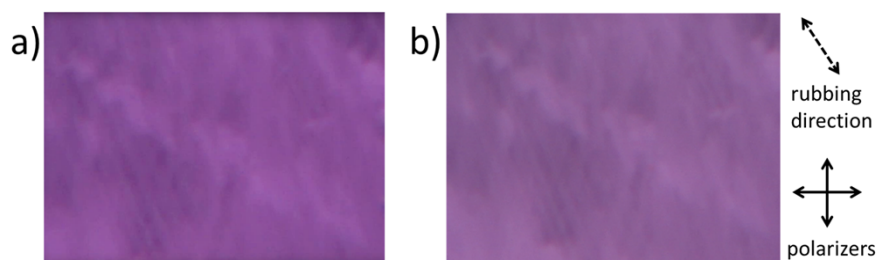

**Fig. S4** Polarized light microphotographs of **1a** in the *N* phase (270 °C) at (a) 0 V and (b) +50V, respectively. The sample was sandwiched between two glass plates with an ITO-thin layer covered with polyimide (cell gap: 5 $\mu$ m, ITO area: 10 mm x 10 mm). The arrows with broken and solid lines indicate the directions of rubbing and polarizers, respectively.

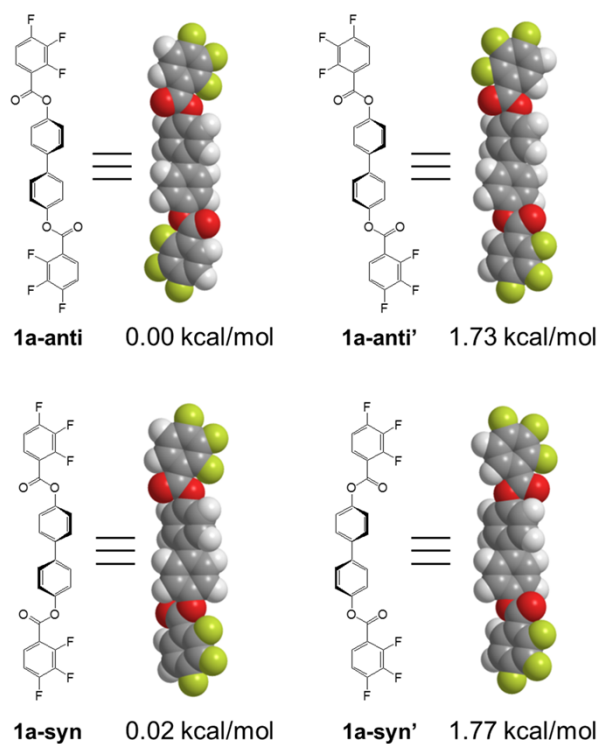

**Fig. S5** Four stable conformers of **1a** obtained by geometry optimization using the density functional theory (DFT) method with B3LYP functional and 6-31G(d) basis set. As the result, **1a-anti** and **1a-syn** were obtained as the two stable conformers. The energies of conformers **1a-anti'** and **1a-syn'** are higher than those of **1a-anti** and **1a-syn**, respectively.
